# Supplementary material for: Association Analysis of Genetic Variants with Type 2 Diabetes in a Mongolian Population in China
Source: Hindawi journal article supplement (doi:10.1155/2015/613236), 2015-01-01
Supplement: f1 [file 613236.f1.pdf]

**Supplemental table 1.** 34 SNPs selected for testing with T2D in a Mongolian sample

| Chromosome | Nearby gene   | SNP        | Risk allele | Reported in current study |           |      | Reported in original work |          |      | Reference               |
|------------|---------------|------------|-------------|---------------------------|-----------|------|---------------------------|----------|------|-------------------------|
|            |               |            |             | risk allele frequency     | P value   | OR   | risk allele frequency     | P value  | OR   |                         |
| 2          | IRS1          | rs7578326  | A           | 0.843                     | 6.40E-08  | 1.27 | NR                        | 5.00E-20 | 1.11 | (Voight et al., 2010)   |
| 12         | HMG2A         | rs1531343  | C           | 0.111                     | 6.16E-07  | 1.08 | NR                        | 4.00E-09 | 1.1  | (Voight et al., 2010)   |
| 15         | PRC1          | rs8042680  | A           | 0.953                     | 5.56E-06  | 1.32 | NR                        | 2.00E-10 | 1.07 | (Voight et al., 2010)   |
| 2          | THADA         | rs7578597  | T           | 0.989                     | 8.01E-06  | 1.92 | 0.9                       | 1.00E-09 | 1.15 | (Zeggini et al., 2008)  |
| 9          | CDKN2         | rs1333051  | A           | 0.836                     | 7.25E-05  | 1.05 | NR                        | 6.00E-10 | 1.22 | (Parra et al., 2011)    |
| 2          | TMEM163       | rs6723108  | T           | 0.997                     | 7.89E-05  | 7.69 | 0.86                      | 7.00E-08 | 1.27 | (Tabassum et al., 2013) |
| 11         | KCNQ1         | rs2237897  | C           | 0.676                     | 8.66E-05  | 1.39 | 0.34                      | 1.00E-16 | 1.33 | (Unoki et al., 2008)    |
| 11         | KCNQ1         | rs163182   | C           | 0.427                     | 1.03E-04  | 1.37 | 0.34                      | 2.00E-17 | 1.28 | (Cui et al., 2011)      |
| 11         | MTNR1B        | rs1387153  | T           | 0.420                     | 2.71E-04  | 1.17 | NR                        | 8.00E-15 | 1.09 | (Voight et al., 2010)   |
| 2          | BCL11A        | rs243021   | A           | 0.715                     | 1.21E-04  | 1.33 | NR                        | 3.00E-15 | 1.08 | (Voight et al., 2010)   |
| 7          | PAX4          | rs10229583 | G           | 0.848                     | 4.54E-04  | 1.28 | 0.825                     | 2.00E-10 | 1.14 | (Ma et al., 2013)       |
| 3          | IGF2BP2       | rs4402960  | T           | 0.320                     | 0.049841  | 1.21 | 0.3                       | 9.00E-16 | 1.14 | (Takeuchi et al., 2009) |
| 2          | GRB14         | rs3923113  | A           | 0.847                     | 0.017313  | 1.2  | 0.74                      | 1.00E-08 | 1.09 | (Kooner et al., 2011)   |
| 13         | SPRY2         | rs1359790  | G           | 0.698                     | 9.88E-03  | 1.18 | 0.71                      | 6.00E-09 | 1.15 | (Shu et al., 2010)      |
| 3          | ADAMTS9       | rs4607103  | C           | 0.594                     | 0.11849   | 1.11 | 0.76                      | 1.00E-08 | 1.09 | (Zeggini et al., 2008)  |
| 11         | KCNJ11        | rs5215     | C           | 0.370                     | 6.08E-03  | 1.03 | NR                        | 5.00E-11 | 1.14 | (Zeggini et al., 2008)  |
| 10         | HHEX,IDE      | rs5015480  | C           | 0.223                     | 0.0056731 | 1.01 | 0.17                      | 9.00E-06 | 1.17 | (Shu et al., 2010)      |
| 10         | TCF7L2        | rs7903146  | T           | 0.053                     | 0.10591   | 1.01 | 0.18                      | 1.00E-08 | 1.34 | (Scott et al., 2007)    |
| 11         | CENTD2        | rs1552224  | A           | 0.896                     | 0.053174  | 1    | NR                        | 1.00E-22 | 1.14 | (Voight et al., 2010)   |
| 15         | RASGRP1       | rs7403531  | T           | 0.375                     | 2.46E-02  | 0.98 | 0.346                     | 4.00E-09 | 1.1  | (Li et al., 2013)       |
| 4          | WFS1          | rs1801214  | T           | 0.947                     | 0.058202  | 0.98 | NR                        | 3.00E-08 | 1.13 | (Voight et al., 2010)   |
| 16         | FTO           | rs8050136  | A           | 0.162                     | 0.1277    | 0.98 | 0.38                      | 1.00E-12 | 1.17 | (Scott et al., 2007)    |
| 8          | TP53INP1      | rs896854   | T           | 0.351                     | 0.031176  | 0.93 | NR                        | 1.00E-09 | 1.06 | (Voight et al., 2010)   |
| 12         | LGR5          | rs7961581  | C           | 0.219                     | 0.061213  | 0.92 | 0.27                      | 1.00E-09 | 1.09 | (Zeggini et al., 2008)  |
| 10         | GRK5          | rs10886471 | C           | 0.755                     | 0.021593  | 0.86 | 0.778                     | 7.00E-09 | 1.12 | (Li et al., 2013)       |
| 6          | C6orf57       | rs1048886  | G           | 0.148                     | 1.24E-04  | 0.67 | 0.18                      | 3.00E-08 | 1.54 | (Sim et al., 2011)      |
| 15         | ZFAND6        | rs11634397 | G           | 0.178                     | 2.59E-05  | 0.67 | NR                        | 2.00E-09 | 1.06 | (Voight et al., 2010)   |
| 5          | ZBED3         | rs4457053  | G           | 0.055                     | 0.014219  | 0.63 | NR                        | 3.00E-12 | 1.08 | (Voight et al., 2010)   |
| 8          | ANK1          | rs515071   | ?           | failed                    |           |      | 0.794                     | 1.00E-08 | 1.18 | (Imamura et al., 2012)  |
| 9          | CDKN2A,CDKN2B | rs10811661 | T           | failed                    |           |      | 0.85                      | 8.00E-15 | 1.2  | (Scott et al., 2007)    |
| X          | DUSP9         | rs5945326  | A           | failed                    |           |      | 0.606                     | 7.00E-16 | 1.18 | (Li et al., 2013)       |
| 7          | CREB5,JAZF1   | rs864745   | T           | failed                    |           |      | 0.5                       | 5.00E-14 | 1.1  | (Zeggini et al., 2008)  |
| 9          | PTPRD         | rs17584499 | T           | failed                    |           |      | 0.06                      | 9.00E-10 | 1.57 | (Tsai et al., 2010)     |
| 2          | BCL11A        | rs243021   | A           | failed                    |           |      | NR                        | 3.00E-15 | 1.08 | (Voight et al., 2010)   |
| 17         | SRR           | rs391300   | G           | failed                    |           |      | 0.62                      | 3.00E-09 | 1.28 | (Tsai et al., 2010)     |
